# Supplementary material for: Magnetic relaxation and three-dimensional critical fluctuations in B-doped Q-carbon – a high-temperature superconductor
Source: Royal Society of Chemistry journal article supplement (doi:10.1039/c8nr03406k), 2018-01-01
Supplement: c8nr03406k1.pdf [file c8nr03406k1.pdf]

## Supplementary information

### **Magnetic relaxation and three-dimensional critical fluctuations in B-doped Q-Carbon - A high-temperature superconductor**

Anagh Bhaumik<sup>1</sup>, Ritesh Sachan<sup>1,2</sup>, Jagdish Narayan<sup>1\*</sup>

<sup>1</sup>Department of Materials Science and Engineering, Centennial Campus

North Carolina State University, Raleigh, NC 27695-7907, USA

<sup>2</sup>Materials Science Division, Army Research Office, Research Triangle Park, NC 27709, USA

\*Correspondence to: [narayan@ncsu.edu](mailto:narayan@ncsu.edu)

### **Additional information:**

Figure S1 depicts the results from high-resolution electron microscopy, electron energy loss spectroscopy (EELS) and unpolarized Raman spectroscopy of B-doped Q-carbon. The filamentary structure (as seen in the SEM figure S1(a)) is a result of interfacial instability during the super undercooling process when nanosecond ArF laser is used.<sup>1</sup> Previous reports indicate a negative electron potential (*w.r.t* diamond-like carbon) of Q-carbon structures which makes it glow with the application of a stage voltage bias.<sup>2</sup> As it is evident from the figure S1(a) that the formed B-doped Q-carbon filamentary structures are well connected which is a critical criterion for the electrical measurements. Figure S1(b) depicts unpolarized Raman spectroscopy of the as-deposited B-C layer and B-doped Q-carbon using 532 nm as the excitation source. As it is evident from the figure S1(b) there is a considerable increase in the  $sp^3$  fraction in B-doped Q-carbon (~84%) as compared to as-deposited B-C sample (~70%). The inset of the figure S1(b) indicates the fitted peaks at  $1105\text{ cm}^{-1}$ ,  $1322\text{ cm}^{-1}$ , and  $1567\text{ cm}^{-1}$  of B-doped Q-carbon. The first two vibrational modes (lower wavenumbers) correspond to  $sp^3$  hybridized carbon whereas the last peak corresponds to  $sp^2$  hybridized carbon. Due to the ultrafast melting and subsequent quenching process in B-doped Q-carbon, there is an increase in the  $sp^3$  fraction. This  $sp^3$  fraction can also be controlled by the laser (wavelength, pulse duration) and substrate (thermal conductivity) parameters which results in the formation of 100%  $sp^3$  crystallite diamond (small undercooling) or Q-carbon (large undercooling).<sup>2</sup> As mentioned before, B-doped  $sp^2$  hybridized carbon (non-superconducting entities) which is present in the B-doped Q-carbon may act as effective pinning sites thereby increasing the values of pinning potential (near  $T_c$ ). This results in superior superconducting properties of B-doped Q-carbon. Q-carbon consists of randomly arranged  $sp^3$  tetrahedra with  $sp^2$  bonding between them. Figure S1(c) depicts the cross-sectional

high angle annular dark field (HAADF) image of the formed superconducting B-doped Q-carbon on c-sapphire substrate, suggesting its uniform amorphous nature. Further details about the B-doping concentration and distribution in Q-carbon were obtained using electron energy-loss spectroscopy (EELS). Figure S1(d) shows a representative as-acquired and background subtracted EEL spectra of B-doped Q-carbon containing B-K (188 eV) and C-K edge (284 eV). Based on the EELS quantification,<sup>3</sup> B concentration is estimated to be 17.0±1.0 at% in Q-carbon. A uniform distribution of B in Q-carbon is also observed which has been reported earlier.<sup>4</sup> The spectrum contains the characteristic  $\pi^*$  and  $\sigma^*$  peaks associated with the K-edge of B and C, which indicates the presence of C and B bonded in both  $sp^3$ - and  $sp^2$ -hybridized state. From the analysis of C-K edge,  $sp^3$  fraction of C in B-doped Q-carbon is estimated to be ~80% which is consistent with the Raman spectroscopy measurements. Additionally, the  $sp^3$  fraction of B, as calculated from the K-edge of B, is determined to be 0.6 which resembles the substitutional B atom in diamond lattice and contributes to the superconducting nature of B-doped Q-carbon.

The Ginzburg-Landau coherence length ( $\epsilon_L$ ) can be calculated using the equation (1):

$$\epsilon_L = [\Phi_0/2\pi H_{c2}(0)]^{0.5} \quad (1)$$

where,  $\Phi_0$  and  $H_{c2}(0)$  denote the superconducting magnetic flux quantum and upper critical field at 0 K, respectively. Using the value of  $H_{c2}(0)$  as 5.42 T, the Ginzburg-Landau coherence length can be calculated. The Ginzburg-Landau parameter ( $\kappa$ ) is calculated using the equation (2):

$$\frac{H_{c1}(0)}{H_{c2}(0)} = \frac{\ln \kappa(k)}{k^2 \times 2\sqrt{2}} \quad (2)$$

The value of  $H_{c1}(0)$  is taken as 0.1 T. In the figure S2(a), we have plotted Difference vs  $\kappa$ , where

$Difference = \frac{H_{c1}(0)}{H_{c2}(0)} - \frac{\ln \kappa(k)}{k^2 \times 2\sqrt{2}}$ . Therefore, we get the values of  $\kappa$  when the value of difference

crosses the  $y=0$  line. As it is evident from figure S2(a), the values of  $\kappa$  are 1.06 and 5.04. We

have reported the value of  $\kappa$  as 1.06 ( $\kappa > 1/\sqrt{2}$ ) when the difference curve first crosses the  $y=0$  line. This also indicates a type-II superconductivity in B-doped Q-carbon. The value of penetration depth ( $\lambda_d$ ) can be calculated using the equation (3):

$$H_{c1}(0) = (\Phi_0/4\pi\lambda_L^2)\ln(\lambda_L/\varepsilon_L) \quad (3)$$

In the attached figure S2(b), we have plotted Difference vs  $\lambda_L$ , where

*Difference* =  $H_{c1}(0) - (\Phi_0/4\pi\lambda_L^2)\ln(\lambda_L/\varepsilon_L)$ . Therefore, we get the values of  $\lambda_L$  when the value of difference crosses the  $y=0$  line. As it is evident from figure S2(b), the values of  $\lambda_L$  are 8.4 and 57.4 nm. We have reported the value of  $\lambda_L$  as 8.4 nm when the difference curve first crosses the  $y=0$  line. We have also plotted the Difference vs  $\lambda_L$  (in figure S2(c)) for Nb superconductor having the values of lower critical field,  $\lambda_L$  and  $\varepsilon_L$  as 198 mT, 58 nm and 38 nm. Figure S2(c) is in excellent accordance with the calculations mentioned above.

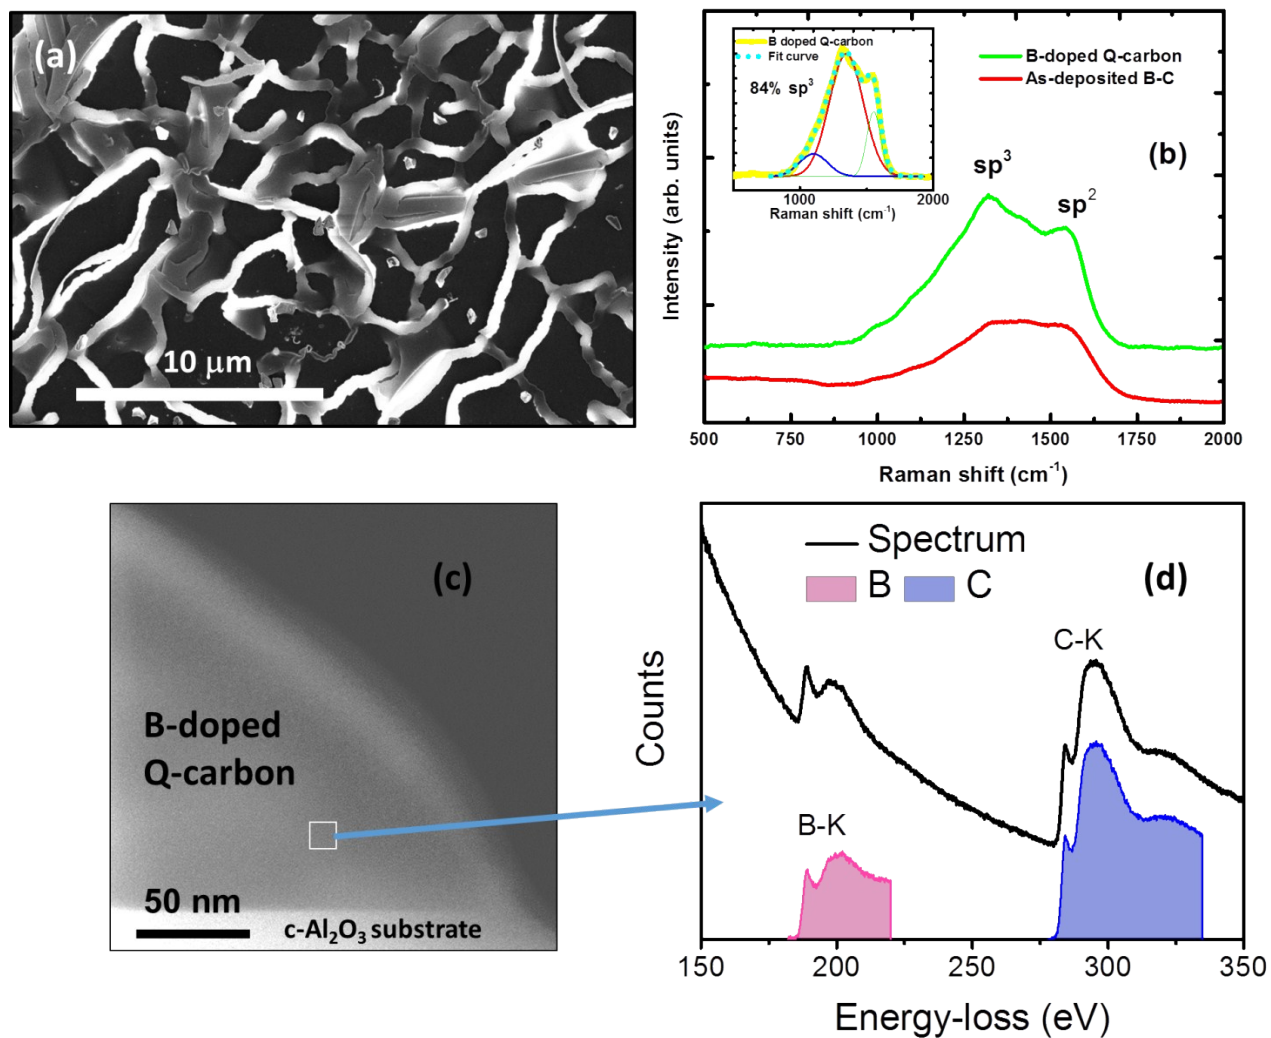

**Figure S1:** (a) High-resolution SEM showing connected filamentary B-doped Q-carbon; (b) Unpolarized Raman spectroscopy of as-deposited B-C and B-doped Q-carbon thin film with the inset showing 84%  $sp^3$  in the B-doped Q-carbon phase; (c) HAADF image of the formed superconducting B-doped Q-carbon on c-sapphire substrate; and (d) EELS of B-doped Q-carbon showing B-K and C-K edges.

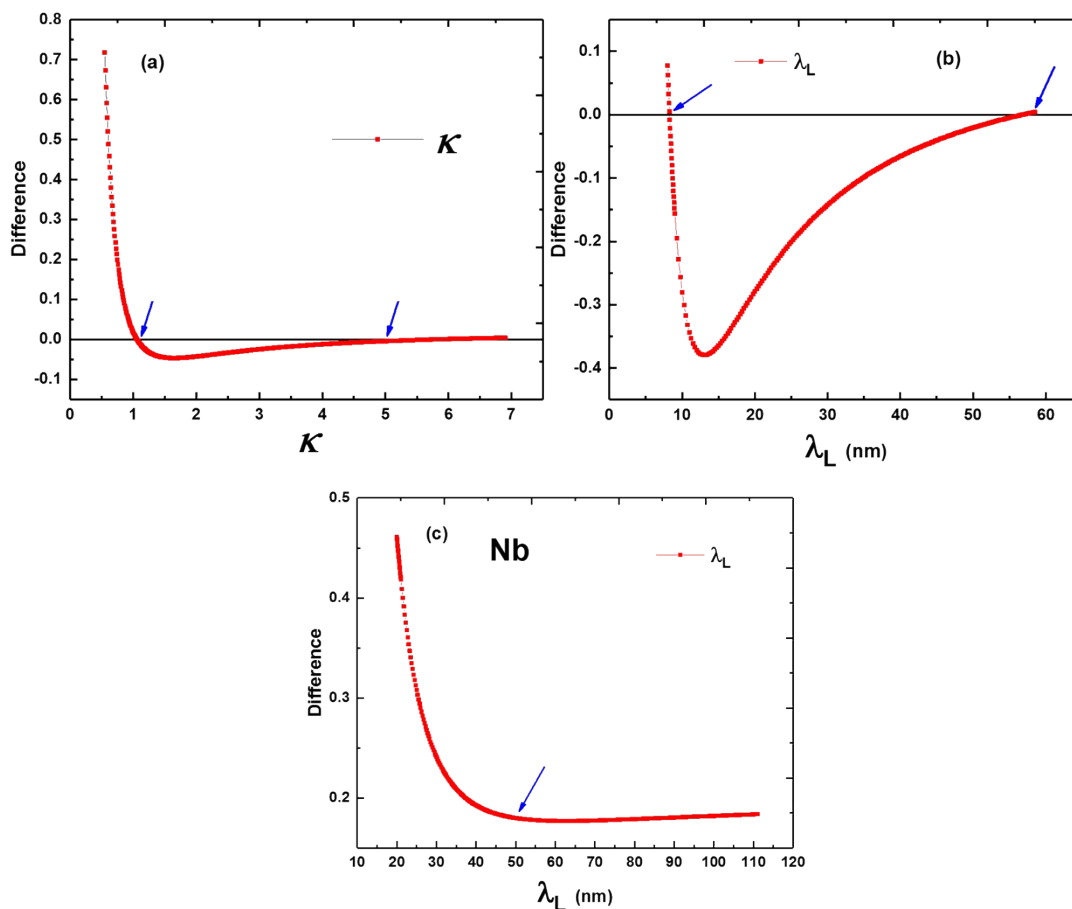

**Figure S2:** (a) The calculated values of  $\kappa$ , (b)  $\lambda_L$  in B-doped Q-carbon; and (c) Calculated value of  $\lambda_L$  in Nb.

### References:

- 1 A. Bhaumik, R. Sachan and J. Narayan, *ACS Nano*, 2017, **11**, 5351–5357.
- 2 J. Narayan and A. Bhaumik, *J. Appl. Phys.*, 2015, **118**, 215303.
- 3 R. Sachan, V. R. Cooper, B. Liu, D. S. Aidhy, B. K. Voas, M. Lang, X. Ou, C. Trautmann, Y. Zhang, M. F. Chisholm and W. J. Weber, *J. Phys. Chem. C*, 2017, **121**, 975–981.
- 4 A. Bhaumik, R. Sachan and J. Narayan, *ACS Nano*, 2017, **11**, 5351–5357.
